# Supplementary material
Source: PubMed Central journal article supplement (PMC4653102)
Supplement: supp_WNL.0000000000002125_Figure_e-2.pdf [file supp_WNL.0000000000002125_Figure_e-2.pdf]

**Supplemental Figure e-2:** Development of antibodies in patients with relapsing symptoms due to autoimmune encephalitis post-HSE

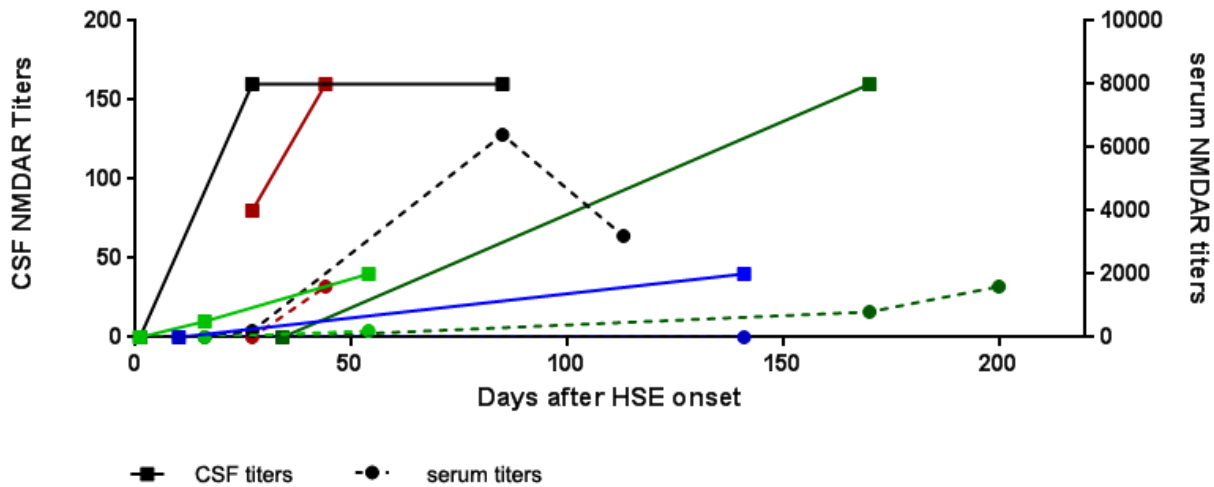

The graph shows the antibody titers in CSF (solid lines) and serum (dotted lines) of 5 patients who had antibody determination during HSE and afterwards (#1, dark green; #3 blue; #5, light green; #9, black; #10, red). Note that the antibodies became detectable in CSF before than in serum, and in one of the patients the serum studies have been negative. All 5 patients (4 of them part of the indicated prospective HSE protocol) are currently being followed clinically and immunologically.
